# Supplementary material for: The first draft genome of the aquatic model plant Lemna minor opens the route for future stress physiology research and biotechnological applications
Source: PubMed Central journal article supplement (PMC4659200; doi:10.1186/s13068-015-0381-1), 2015-11-25

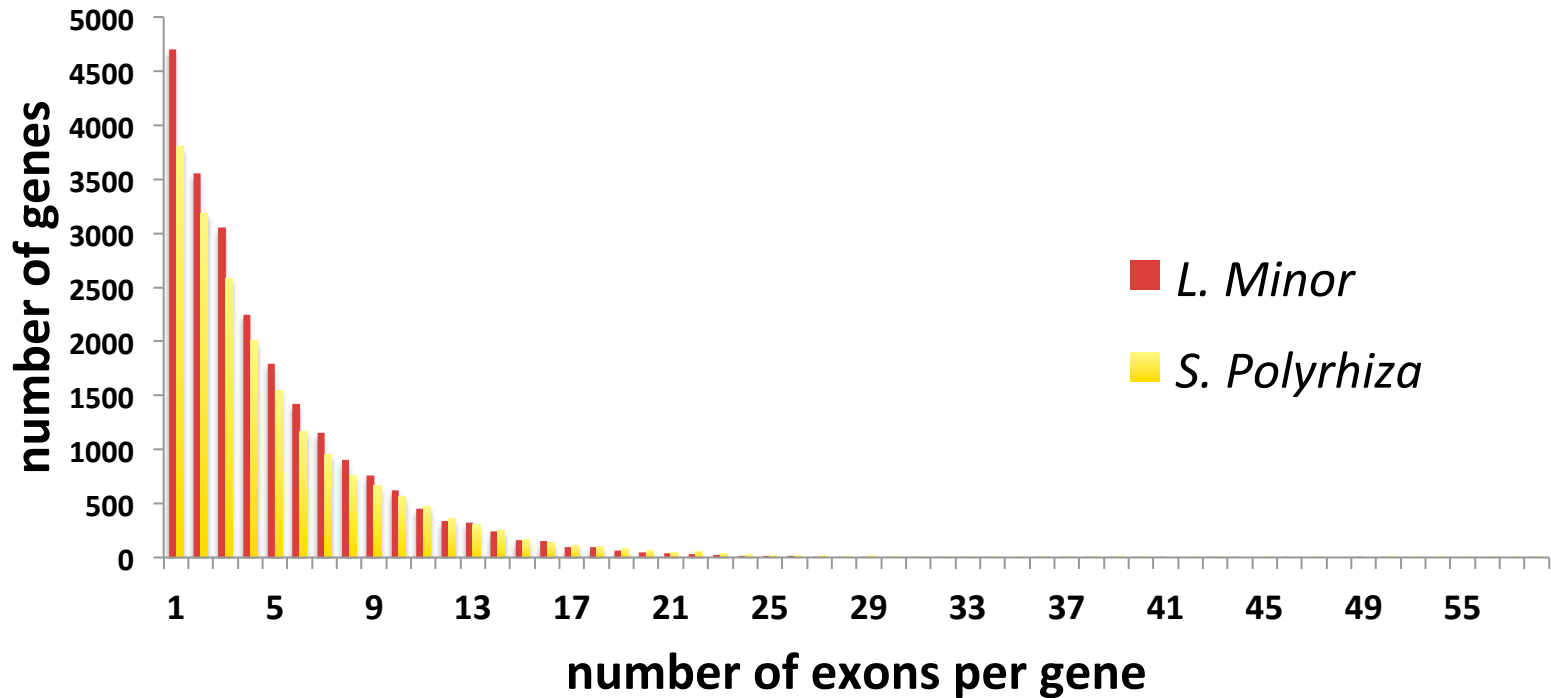

Supplement: 13068_2015_381_MOESM9_ESM.pdf [file 13068_2015_381_MOESM9_ESM.pdf]
