# Supplementary material for: The first draft genome of the aquatic model plant Lemna minor opens the route for future stress physiology research and biotechnological applications
Source: PubMed Central journal article supplement (PMC4659200; doi:10.1186/s13068-015-0381-1), 2015-11-25

100  
 ■ *Lemna minor* ■ *Spirodela polyrhiza* ■ *Oryza sativa* ■ *Zea mays*

Number of genes (%)

10  
 1

cellular process  
 metabolic process  
 protein metabolic process  
 biosynthetic process  
 DNA metabolic process  
 response to stress  
 transport  
 carbohydrate metabolic process  
 lipid metabolic process  
 signal transduction  
 translation  
 cellular component organization  
 multicellular organismal  
 catabolic process  
 cytoplasm  
 membrane  
 nucleus  
 intracellular  
 cell  
 plasma membrane  
 cytosol  
 ribosome  
 catalytic activity  
 protein binding  
 nucleic acid binding  
 nucleotide binding  
 DNA binding  
 RNA binding  
 transferase activity  
 hydrolase activity  
 kinase activity

Biological Process

Cellular Component

Molecular Function

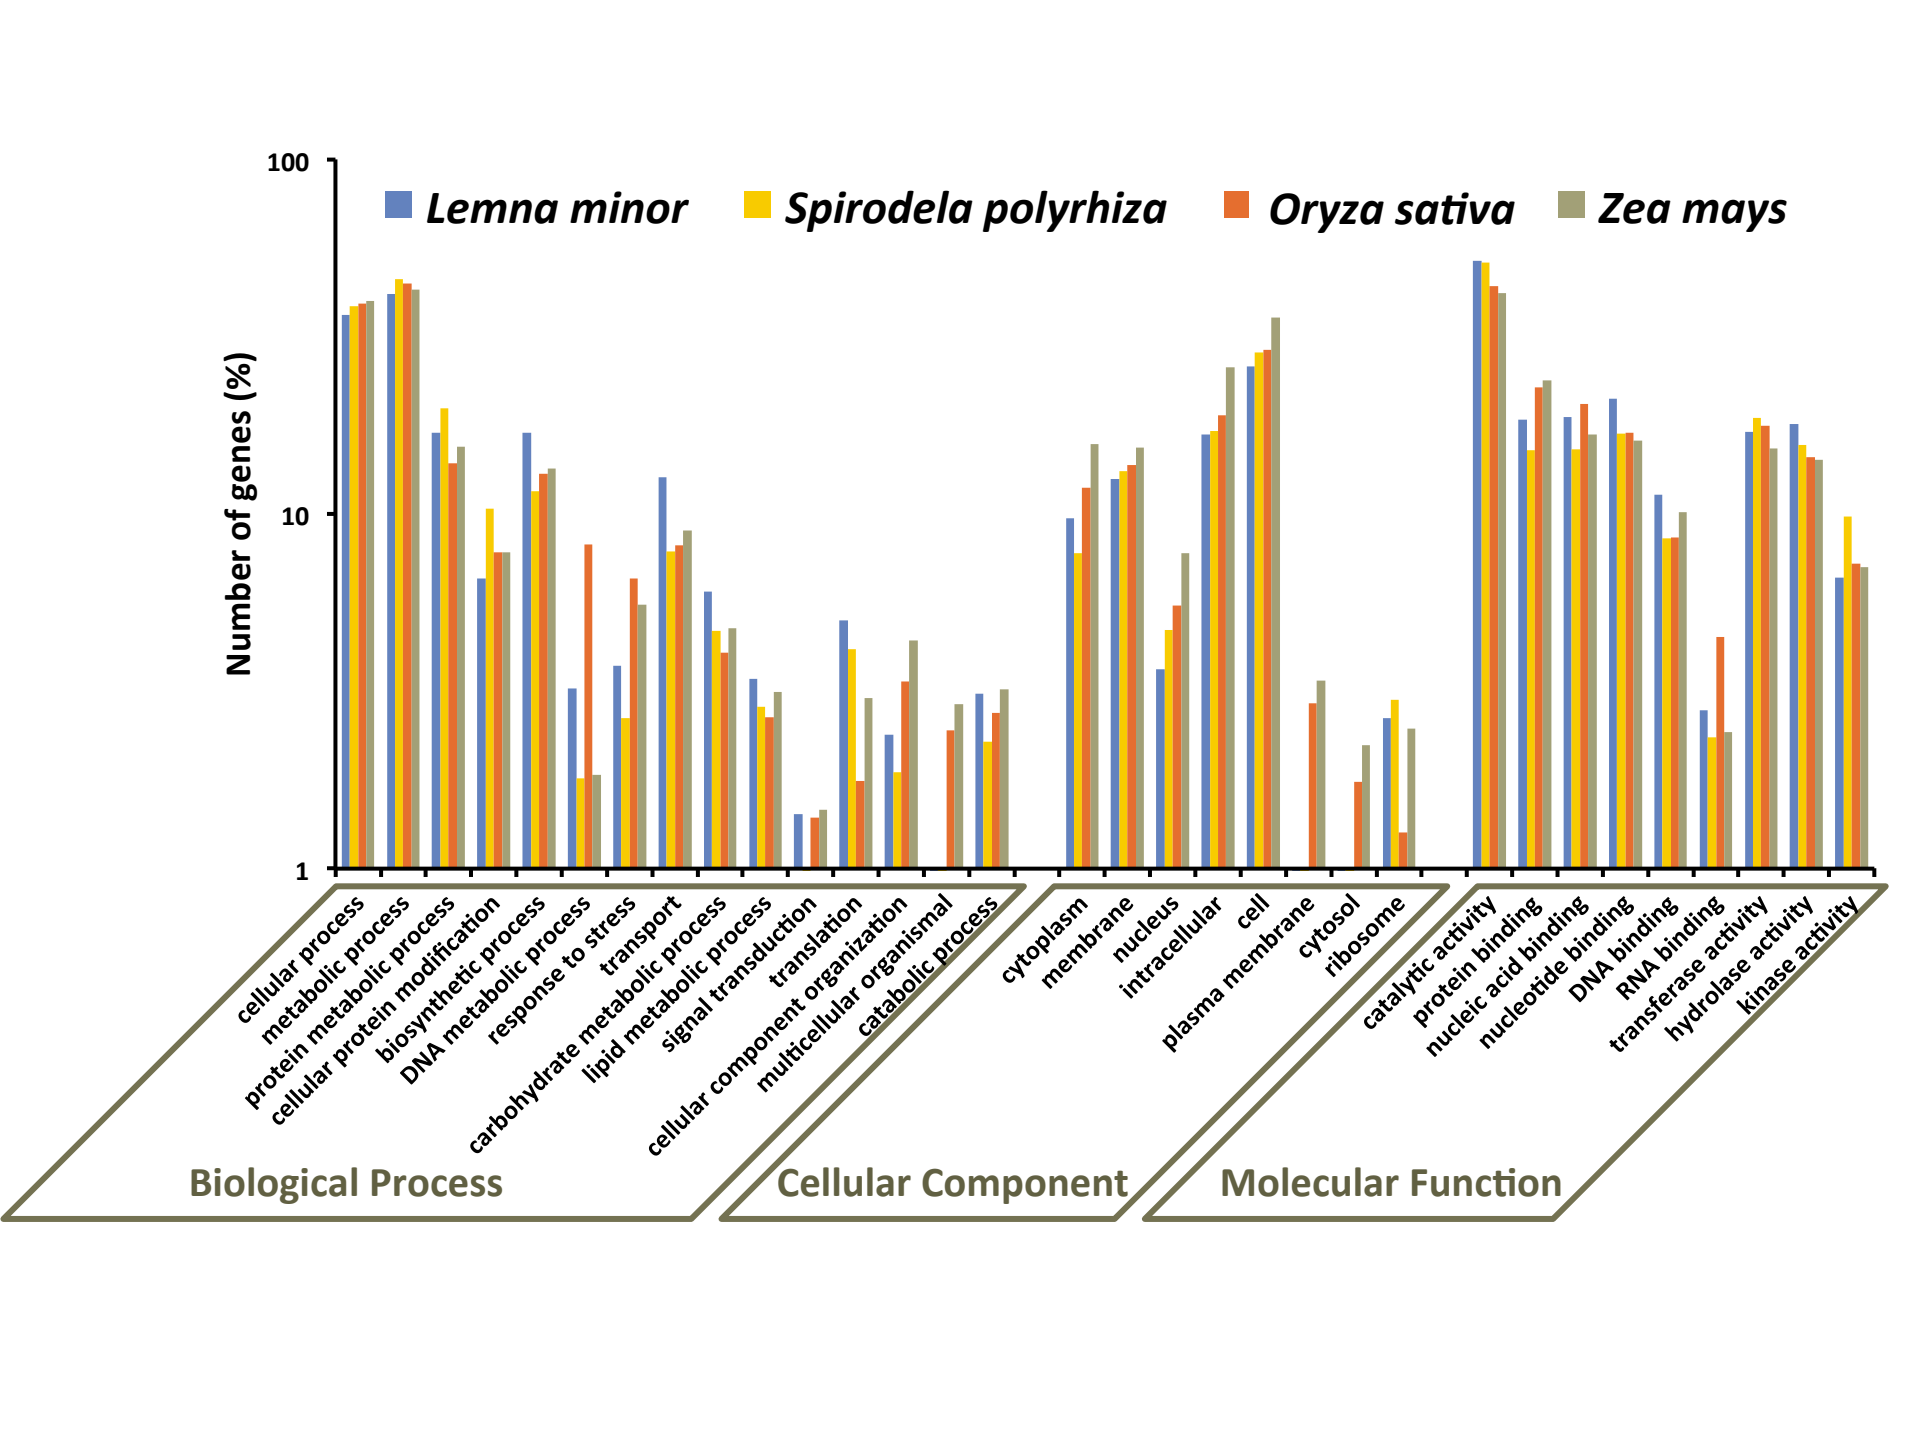

Supplement: 13068_2015_381_MOESM12_ESM.pdf [file 13068_2015_381_MOESM12_ESM.pdf]
